# Supplementary material for: Effects of Top and Bottom Electrodes Materials and Operating Ambiance on the Characteristics of MgFx Based Bipolar RRAMs
Source: MDPI journal article supplement (doi:10.3390/nano13061127), 2023-03-22
Supplement: s1 [file s1]

# Effects of Top and Bottom Electrodes Materials and Operating Ambiance on the Characteristics of $\text{MgF}_x$ Based Bipolar RRAMs

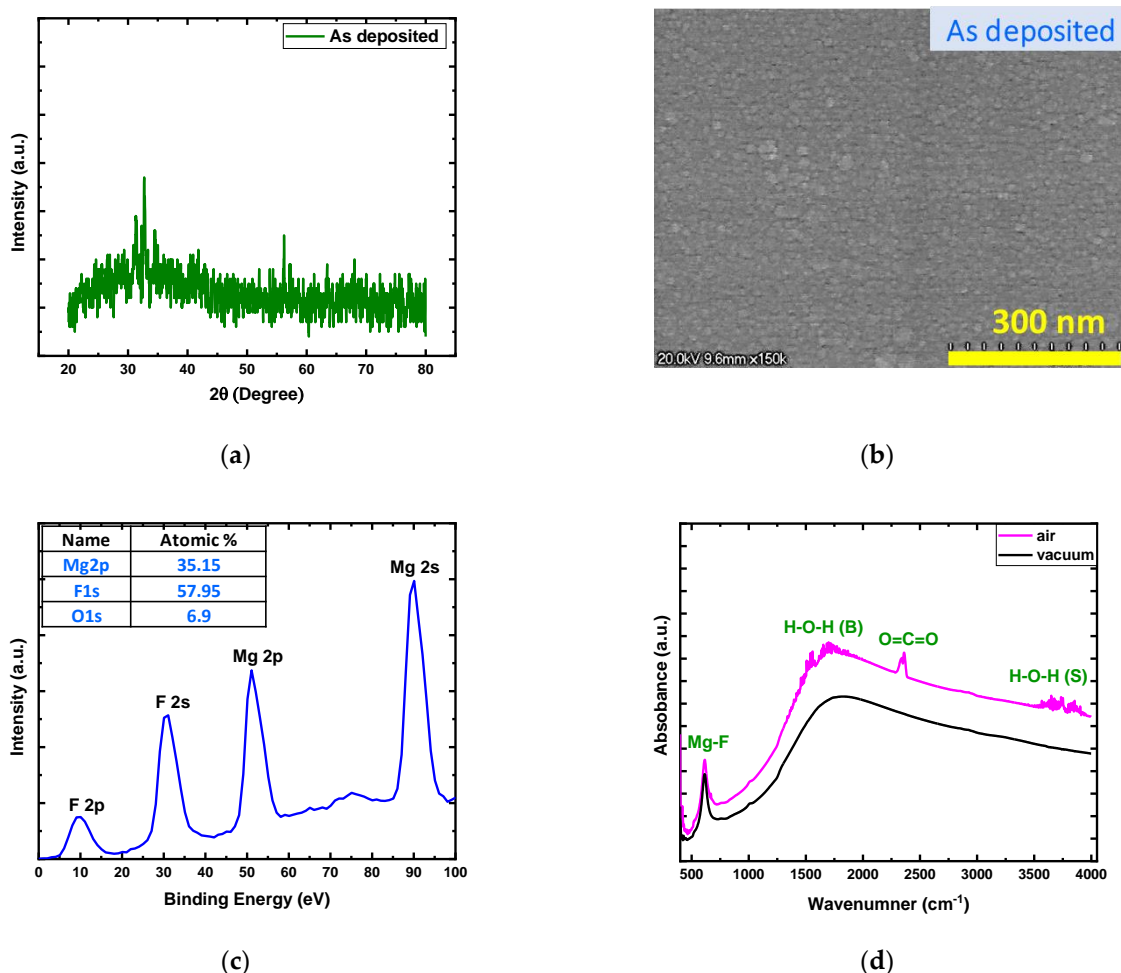

**Figure S1.** Structural and compositional analysis of  $\text{MgF}_x$  thin film (a) XRD pattern of  $\text{MgF}_x$  film; (b) SEM image of the surface; (c) XPS analysis with characteristics peaks and atomic percentages of magnesium and fluorine; (d) FTIR absorbance spectra in open air and vacuum environment [23–25].

## References

23. Das, N.C.; Kim, M.; Rani, J.R.; Hong, S.-M.; Jang, J.-H. Electroforming-Free Bipolar Resistive Switching Memory Based on Magnesium Fluoride. *Micromachines* **2021**, *12*, 1049, doi:10.3390/mi12091049.
24. Das, N.C.; Kim, M.; Rani, J.R.; Hong, S.-M.; Jang, J.-H. Nanoscale Low-temperature characteristics of magnesium fluoride based bipolar RRAM devices. **2022**, doi:10.1039/d1nr05887h.
25. Das, N.C.; Kim, M.; Kwak, D.U.; Rani, J.R.; Hong, S.M.; Jang, J.H. Effects of the Operating Ambiance and Active Layer Treatments on the Performance of Magnesium Fluoride Based Bipolar RRAM. *Nanomaterials* **2022**, *12*, doi:10.3390/nano12040605.
